# Supplementary material for: Anti-Melanogenic Potentials of Nanoparticles from Calli of Resveratrol-Enriched Rice against UVB-Induced Hyperpigmentation in Guinea Pig Skin
Source: PubMed Central journal article supplement — Biomol Ther (Seoul). 2016 Jan 1;24(1):85–93. doi: 10.4062/biomolther.2015.165 (PMC4703357; doi:10.4062/biomolther.2015.165), 2016-01-01
Supplement: BT-24-085-suppl.pdf [file BT-24-085-suppl.pdf]

(A)

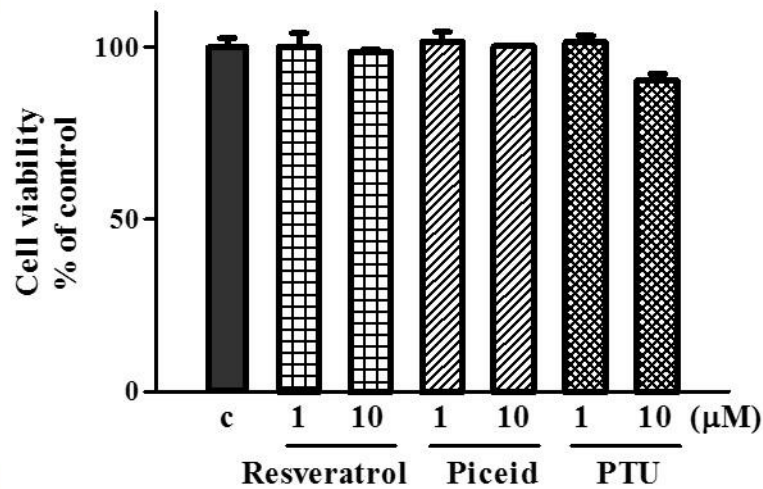

(B)

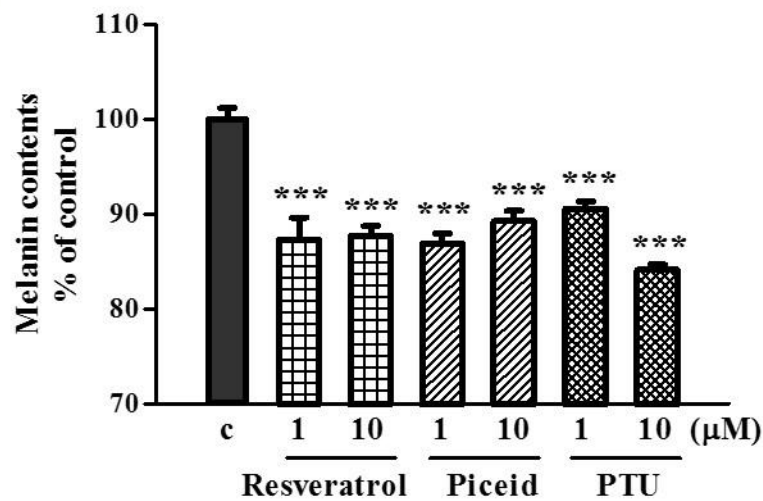

**Supplement 1. Effects of resveratrol and piceid on melanin synthesis in melan-a cells.**

Cell viability (A) and melanin contents (B) were determined in melan-a cells treated with 1 and 10 μM resveratrol, piceid and PTU (positive control) for 72 h. The results are the averages of the three independent experiments, and statistical comparisons were performed using one-way analysis of variance (ANOVA) with Tukey' multiple comparisons test. The level of statistical significance was set at \*\*\*P < 0.001.
